# Supplementary material for: COL5A1 RS12722 Is Associated with Temporomandibular Joint Anterior Disc Displacement without Reduction in Polish Caucasians
Source: MDPI journal article supplement (doi:10.3390/cells10092423), 2021-09-14
Supplement: s1 [file s1]

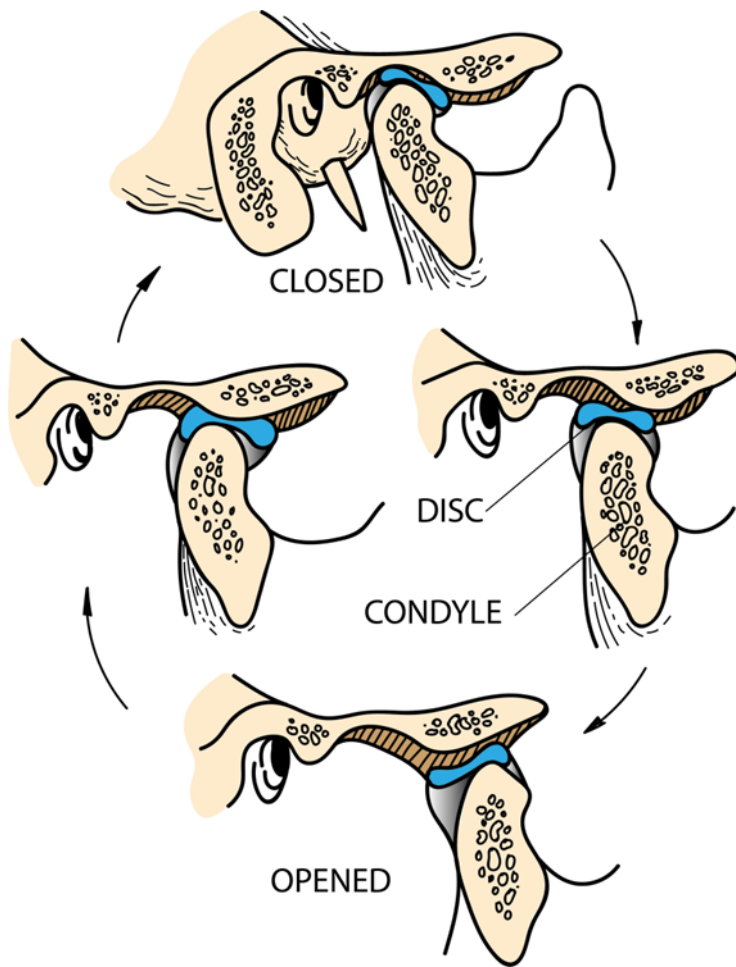

Figure S1.: Relation of the TMJ condyle and the disc in closed and open position.

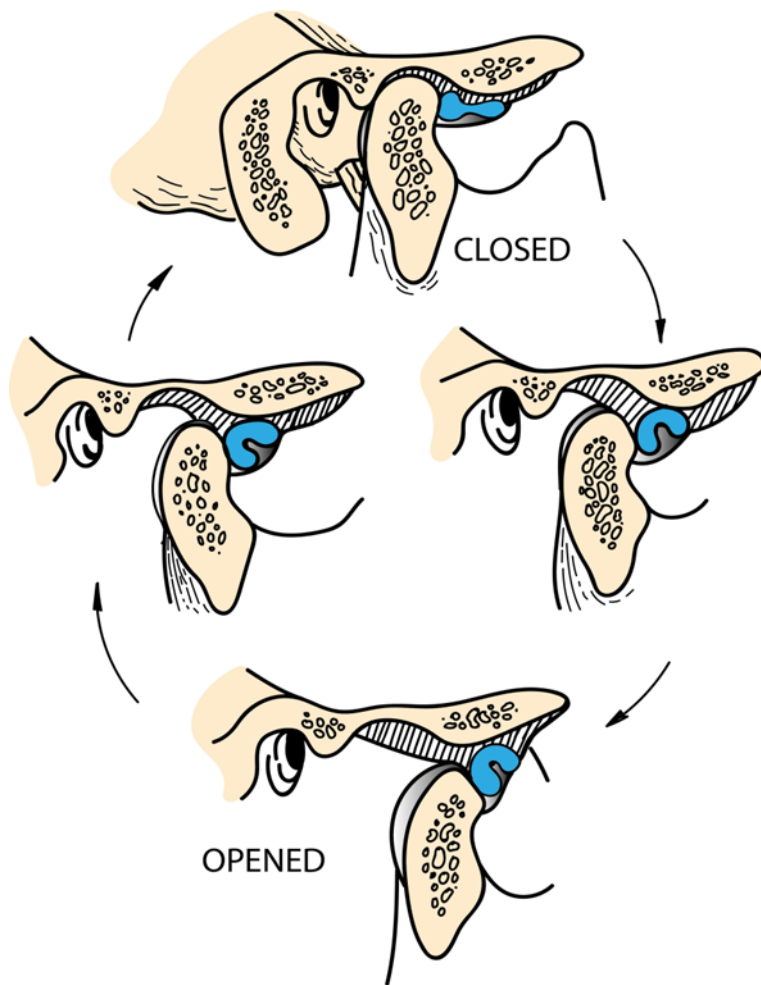

Figure S2. Anterior disc displacement without reduction - the sagittal view.
